# Supplementary material
Source: PubMed Central journal article supplement (PMC4244877)
Supplement: CJP-2014-vol59-November-586-590-eAppendix.pdf [file CJP-2014-vol59-November-586-590-eAppendix.pdf]

Shanmugalingam A, Ferreria SG, Norman RMG, et al. Research experience in psychiatry residency programs across Canada: current status. *Can J Psychiatry*. 2014;59(11):586–590.

## **eAppendix 1: Questionnaire**

**1. Which institution are you completing your residency? (please circle one)**

- (a) *Calgary University*
- (b) *Dalhousie University*
- (c) *Laval University*
- (d) *McGill University*
- (e) *McMaster University*
- (f) *Memorial University*
- (g) *Queen's University*
- (h) *Sherbrooke University*
- (i) *University of Alberta*
- (j) *University of British Columbia*
- (k) *University of Manitoba*
- (l) *University of Montreal*
- (m) *University of Ottawa*
- (n) *University of Toronto*
- (o) *Western University*

**2. Are you a (circle postgraduate year)? PGY1 PGY2 PGY3 PGY4 PGY5**

**3. Is conducting a research project a mandatory requirement within your program?**  
Yes    No    Don't know

If yes, please indicate year it became mandatory: \_\_\_\_\_

**4. If mandatory, how many research projects are you required to complete by graduation?**

1      2      >2      Don't Know      Not Applicable

5. *If mandatory, which of the following, if done qualifies and fulfills the research requirement (please circle all that apply)*  
(a) *Literature Review*  
(b) *Case Report*  
(c) *Quality Improvement Research Project*  
(d) *Assisting in a faculty's project (i.e. data collection, chart review, etc)*  
(e) *Full Clinical Project*  
(f) *Other—Please specify: \_\_\_\_\_*  
(g) *Not Applicable*
6. *Is it mandatory to have REB (Research Ethics Board) approval?*  
*Yes    No    Don't Know    Not Applicable*
7. *Is it a mandatory requirement to present your project at a research day or grand rounds?*  
*Yes    No    Don't Know    Not Applicable*
8. *Is it mandatory to publish your research project?*  
*Yes    No    Don't Know    Not Applicable*
9. *Is there an official resident requirement policy/guidelines in place at your program?*  
*Yes    No    Don't Know*
10. *Do you have a research track for residents?*  
*Yes    No    Don't Know*
11. *Is the publication level of residents in your post-graduate psychiatry program tracked?*  
*Yes    No    Don't Know*
- If Yes, how is this tracked? (e.g. Annual research report)*
12. *Does your program have a research coordinator or a similar position who provides guidance in research endeavors?*  
*Yes    No    Don't Know*
13. *What supports are provided at your institution to help residents complete a research project? (Check all that apply).*  
(a) *Protected time*  
(b) *Financial support that can be applied for*  
(c) *Data analysts or software to manage the data*  
(d) *Faculty or Supervisor*  
(e) *Research Assistant*  
(f) *Other—Please specify: \_\_\_\_\_*

14. *If research is not required to graduate, how likely would you have completed a research project?*

*Highly likely   Likely   Not likely*

15. *The current research curriculum at your institution will (please circle one):*

*(a) Prepare residents to conduct independent research and critically evaluate research after completing research training.*

*(b) Not be helpful in providing residents with skills with regard to carrying out or critically evaluating research.*

*(c)*
